# Supplementary material for: A mesoporous–planar hybrid architecture of methylammonium lead iodide perovskite based solar cells
Source: Royal Society of Chemistry journal article supplement (doi:10.1039/c6ta06960f), 2016-01-01
Supplement: c6ta06960f1.pdf [file c6ta06960f1.pdf]

**Supporting Information:**

**Mesoporous-Planar hybrid architecture of methylammonium lead iodide perovskite based solar cells**

Ravi K. Misra, Sigalit Aharon, Michael Layani, Shlomo Magdassi & Lioz Etgar

Institute of Chemistry, Casali Center for Applied Chemistry, Hebrew University of Jerusalem, Givat Ram

Campus, Jerusalem, Israel-91904

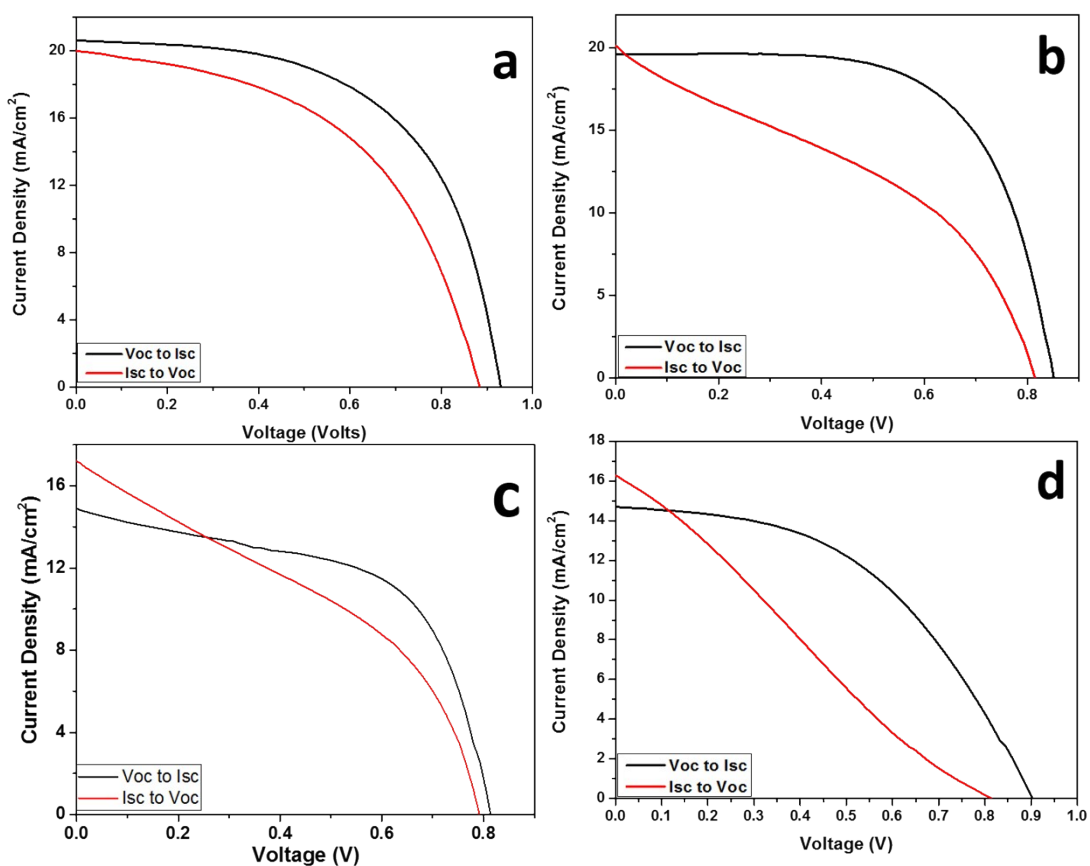

**Figure S1:** The forward and backward J-V scans of (a) mesoporous cell, (b) meso-planar hybrid cell (50 micron grid), (c) meso-planar hybrid cell (72 micron grid), and (d) planar cell, showing the extent of hysteresis in these architectures.

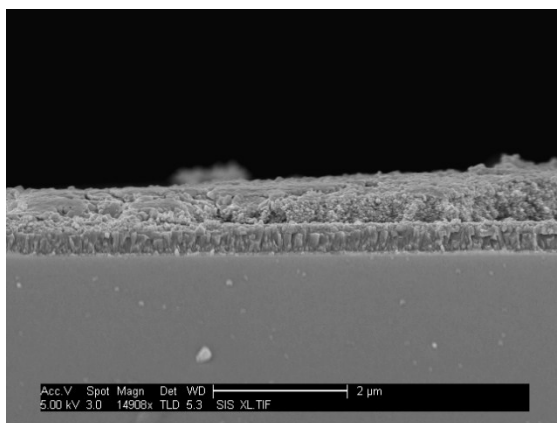

**Figure S2:** Cross sectional HR-SEM image of meso-planar hybrid architecture of the cell (as captured).

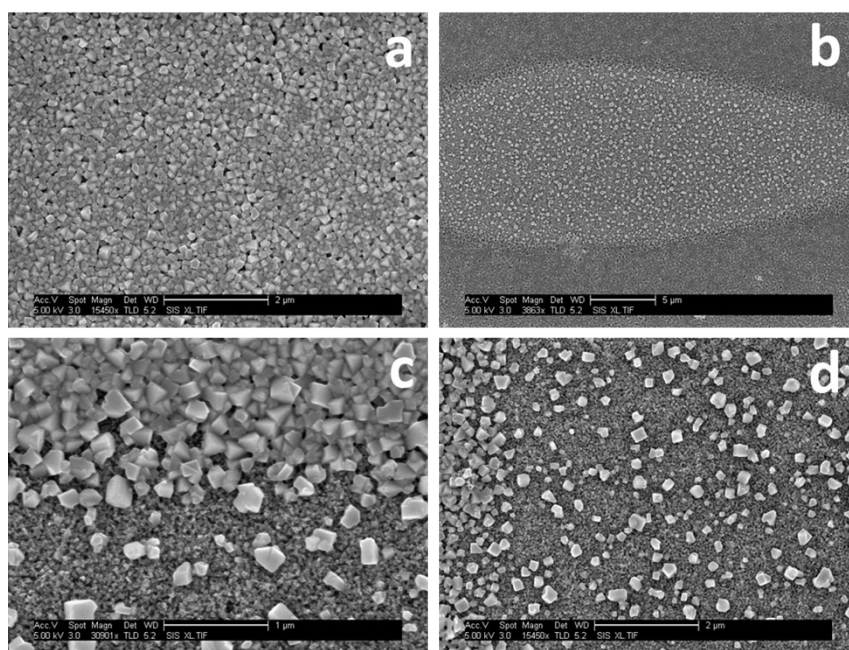

**Figure S3:** a-d are showing the perovskite density at different locations of grid cells, the much dense perovskite coverage is evident in image a, the valley region of the titania grid, whereas b-d are showing enlarged view of the junction of meso-planar area and peaks of titania at mesh junction points. These recombination centers are responsible for some of the performance loss of meso-planar hybrid cell structures.

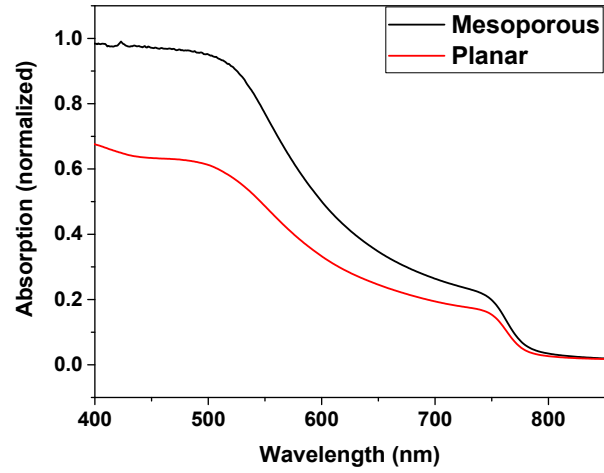

**Figure S4:** Absorption spectra of Mesoporous and planar cells, showing normalized spectra in the range of 400-850 nm.
